# Supplementary material for: Identification of Autoimmunity to Peptides of Collagen V α1 Chain as Newly Biomarkers of Early Stage of Systemic Sclerosis
Source: PubMed Central journal article supplement (PMC7907509; doi:10.3389/fimmu.2020.604602), 2021-02-12
Supplement: Table_1.pdf [file Table_1.pdf]

**Supplementary table 1- Clinical and laboratorial features of patients with early-SSc\*\***

|                                   | Sera Anti Col V |            | <i>p</i> value (Mann-Whitney or Fisher's exact)* |
|-----------------------------------|-----------------|------------|--------------------------------------------------|
|                                   | Positive        | Negative   |                                                  |
| Number (%)                        | 7 (36.8)        | 10 (58.8)  |                                                  |
| Age, median (range)               | 54 (27-70)      | 49 (16-65) | 0.53                                             |
| Females, N (%)                    | 7 (100)         | 10 (100)   | -                                                |
| Illness time, N (%)               |                 |            |                                                  |
| <5 years                          | 4 (60%)         | 8 (80%)    | 0.604                                            |
| >5 years                          | 2 (40%)         | 2 (20%)    |                                                  |
| Symptom time***, N (%)            |                 |            |                                                  |
| >10 years                         | 4 (60%)         | 0          | 0.008                                            |
| < 10 years                        | 2 (20%)         | 10 (100%)  |                                                  |
| Rheumatoid factor, N (%)          | 7 (100%)        | 10 (100%)  | -                                                |
| Telangiectasia, N (%)             |                 |            |                                                  |
| <i>absence</i>                    | 6 (85.7%)       | 4 (40%)    | 0.082                                            |
| <i>presence</i>                   | 1 (14.3%)       | 6 (60%)    |                                                  |
| Digital ulcers, N (%)             |                 |            |                                                  |
| <i>absence</i>                    | 5 (71.4%)       | 6 (60.0%)  | 0.516                                            |
| <i>presence</i>                   | 2 (28.6%)       | 4 (40.0%)  |                                                  |
| Puffy fingers                     |                 |            |                                                  |
| <i>absence</i>                    | 6 (87.7%)       | 4 (40%)    | 0.082                                            |
| <i>presence</i>                   | 1 (14.3%)       | 6 (60%)    |                                                  |
| Periungueal capillaroscopy, N (%) |                 |            |                                                  |
| <i>abnormal</i>                   | 5 (71.4%)       | 9 (90%)    | 0.360                                            |
| <i>normal</i>                     | 2 (26.6%)       | 1 (10%)    |                                                  |
| Anti-nuclear factor, N (%)        | 7 (100%)        | 10 (100%)  | -                                                |
| <i>positive</i>                   |                 |            |                                                  |
| Anti-scleroderma 70, N (%)        |                 |            |                                                  |
| <i>negative</i>                   | 6 (85.7%)       | 8 (80%)    | 0.640                                            |
| <i>positive</i>                   | 1 (14.3%)       | 2 (20%)    |                                                  |
| Anti centriole antibody, N (%)    |                 |            |                                                  |
| <i>negative</i>                   | 3 (42.9%)       | 5 (50%)    | 0.581                                            |
| <i>positive</i>                   | 4 (57.1%)       | 5 (50%)    |                                                  |

\*Continuous variables presenting non-parametric data distribution were compared by Mann-Whitney test ( $p < 0.05$ ). Categorical variables were compared by Fisher's exact test ( $p < 0.05$ ). \*\* EULAR Preliminary Criteria (38,39)

\*\*\*Time of the first disease symptom
