# Supplementary material for: Identification of Autoimmunity to Peptides of Collagen V α1 Chain as Newly Biomarkers of Early Stage of Systemic Sclerosis
Source: PubMed Central journal article supplement (PMC7907509; doi:10.3389/fimmu.2020.604602), 2021-02-12
Supplement: Table_2.pdf [file Table_2.pdf]

**Supplementary table 2** - Detection of autoantibodies to Col V  $\alpha$ 1 and  $\alpha$ 2 chains in early-SSc sera tested positive to anti-Col V and control sera by flow cytometry

| Peptides     |           | Sera Auto-antibodies<br>(Mean $\pm$ Std. Error % <sup>**</sup> ) | <i>p</i> value<br>(Early-SSc vs<br>Control)* |
|--------------|-----------|------------------------------------------------------------------|----------------------------------------------|
| Col5A1(599)  | Early-SSc | 39.02 $\pm$ 9.05                                                 | 0.142                                        |
|              | Control   | 19.68 $\pm$ 6.29                                                 |                                              |
| Col5A1(799)  | Early-SSc | 22.65 $\pm$ 7.31                                                 | 0.749                                        |
|              | Control   | 23.39 $\pm$ 5.92                                                 |                                              |
| Col5A1(909)  | Early-SSc | 20.54 $\pm$ 7.70                                                 | 0.643                                        |
|              | Control   | 18.89 $\pm$ 5.04                                                 |                                              |
| Col5A1(1049) | Early-SSc | 44.85 $\pm$ 5.48                                                 | 0.004*                                       |
|              | Control   | 14.69 $\pm$ 3.90                                                 |                                              |
| Col5A1(1439) | Early-SSc | 43.74 $\pm$ 5.25                                                 | 0.006*                                       |
|              | Control   | 22.70 $\pm$ 4.20                                                 |                                              |
| Col5A2(275)  | Early-SSc | 11.08 $\pm$ 2.71                                                 | 0.257                                        |
|              | Control   | 7.20 $\pm$ 3.50                                                  |                                              |
| Col5A2(419)  | Early-SSc | 9.37 $\pm$ 2.29                                                  | 0.345                                        |
|              | Control   | 5.93 $\pm$ 4.27                                                  |                                              |
| Col5A2(1078) | Early-SSc | 13.27 $\pm$ 4.75                                                 | 0.732                                        |
|              | Control   | 8.16 $\pm$ 3.83                                                  |                                              |

\*Continuous variables presenting parametric data distribution were compared by Student t-test test ( $p < 0.05$ ).

\*\* Percentage of the fluorescent bead-bonded anti-Col V peptides in sera from early-SSc patients and healthy individuals quantified by flow cytometry.
