# Supplementary material for: Identification of Autoimmunity to Peptides of Collagen V α1 Chain as Newly Biomarkers of Early Stage of Systemic Sclerosis
Source: PubMed Central journal article supplement (PMC7907509; doi:10.3389/fimmu.2020.604602), 2021-02-12
Supplement: Table_3.pdf [file Table_3.pdf]

**Supplementary Table 3** – Correlation between defined-SSc lung tissue immunostaining (Col V) and anti Col V-peptides detected in early-SSc sera (anti-ColV+)

| Early-SSc sera (anti-ColV+) | Defined-SSc lung tissue immunostaining (Col V) |       |
|-----------------------------|------------------------------------------------|-------|
| Anti-Col V peptides         | Correlation (r)                                | p*    |
| Anti-Pept Col5A1(599)       | 0.930                                          | 0.007 |
| Anti-Pept Col5A1(779)       | 0.854                                          | 0.030 |

\* Kruskal-Wallis tests for comparison between defined-SSc lung tissue immunostaining and anti-Col V peptides detected in early-SSc sera. P-value<0.05 was considered significant.

r: Pearson correlation was employed to test association between continuous variables.
